# Supplementary material
Source: PubMed Central journal article supplement (PMC7055933)

**Supplementary Table 1. Total Adverse Event Summary**

| Adverse Event                    |     | Grade |      |   |      |   |      |   |      |
|----------------------------------|-----|-------|------|---|------|---|------|---|------|
|                                  |     | 1     |      | 2 |      | 3 |      | 4 |      |
|                                  |     | N     | %    | N | %    | N | %    | N | %    |
| Type                             | Arm |       |      |   |      |   |      |   |      |
| Aspartate aminotransferase incre | 1   | 13    | 41.9 | 2 | 6.5  | 2 | 6.5  | 1 | 3.2  |
|                                  | 2   | 1     | 6.7  |   |      |   |      |   |      |
|                                  | 3   | 5     | 55.6 | 1 | 11.1 | 1 | 11.1 |   |      |
| Fatigue                          | 1   | 9     | 29.0 | 2 | 6.5  | 3 | 9.7  |   |      |
|                                  | 2   | 4     | 26.7 | 3 | 20.0 |   |      |   |      |
|                                  | 3   | 1     | 11.1 | 2 | 22.2 |   |      |   |      |
| Alanine aminotransferase increas | 1   | 12    | 38.7 | 3 | 9.7  | 3 | 9.7  |   |      |
|                                  | 3   | 4     | 44.4 | 1 | 11.1 |   |      |   |      |
| Platelet count decreased         | 1   | 12    | 38.7 |   |      |   |      |   |      |
|                                  | 2   | 2     | 13.3 |   |      | 1 | 6.7  | 1 | 6.7  |
|                                  | 3   | 2     | 22.2 |   |      |   |      |   |      |
| Hypertension                     | 1   | 1     | 3.2  | 7 | 22.6 | 6 | 19.4 |   |      |
|                                  | 3   | 1     | 11.1 | 2 | 22.2 |   |      |   |      |
| Nausea                           | 1   | 6     | 19.4 | 3 | 9.7  |   |      |   |      |
|                                  | 2   | 4     | 26.7 | 2 | 13.3 | 1 | 6.7  |   |      |
|                                  | 3   |       |      | 1 | 11.1 |   |      |   |      |
| Diarrhea                         | 1   | 6     | 19.4 | 4 | 12.9 | 1 | 3.2  |   |      |
|                                  | 2   |       |      |   |      | 1 | 6.7  |   |      |
|                                  | 3   | 1     | 11.1 | 2 | 22.2 |   |      |   |      |
| Vomiting                         | 1   | 3     | 9.7  | 2 | 6.5  | 1 | 3.2  |   |      |
|                                  | 2   | 2     | 13.3 | 3 | 20.0 |   |      |   |      |
| Neutrophil count decreased       | 1   | 3     | 9.7  | 3 | 9.7  |   |      |   |      |
|                                  | 2   |       |      | 1 | 6.7  |   |      | 2 | 13.3 |
|                                  | 3   |       |      | 1 | 11.1 |   |      |   |      |
| Anorexia                         | 1   | 2     | 6.5  | 3 | 9.7  |   |      |   |      |
|                                  | 3   |       |      | 2 | 22.2 |   |      |   |      |

| Adverse Event                  |   | Grade |      |   |      |   |     |   |     |
|--------------------------------|---|-------|------|---|------|---|-----|---|-----|
|                                |   | 1     |      | 2 |      | 3 |     | 4 |     |
|                                |   | N     | %    | N | %    | N | %   | N | %   |
| Alkaline phosphatase increased | 1 | 2     | 6.5  | 1 | 3.2  | 2 | 6.5 |   |     |
|                                | 2 | 1     | 6.7  |   |      |   |     |   |     |
| Anemia                         | 1 | 2     | 6.5  |   |      |   |     |   |     |
|                                | 2 |       |      | 1 | 6.7  |   |     |   |     |
|                                | 3 | 3     | 33.3 |   |      |   |     |   |     |
| Blood bilirubin increased      | 1 | 2     | 6.5  |   |      | 2 | 6.5 |   |     |
|                                | 3 | 2     | 22.2 |   |      |   |     |   |     |
| Weight loss                    | 1 | 2     | 6.5  | 2 | 6.5  |   |     |   |     |
|                                | 3 | 1     | 11.1 | 1 | 11.1 |   |     |   |     |
| White blood cell decreased     | 1 | 2     | 6.5  | 1 | 3.2  |   |     |   |     |
|                                | 2 |       |      |   |      |   |     | 1 | 6.7 |
|                                | 3 | 1     | 11.1 | 1 | 11.1 |   |     |   |     |
| Constipation                   | 1 | 3     | 9.7  |   |      |   |     |   |     |
|                                | 2 | 2     | 13.3 |   |      |   |     |   |     |
| Dry mouth                      | 1 | 2     | 6.5  | 2 | 6.5  |   |     |   |     |
|                                | 3 | 1     | 11.1 |   |      |   |     |   |     |
| Dysgeusia                      | 1 | 4     | 12.9 |   |      |   |     |   |     |
|                                | 2 | 1     | 6.7  |   |      |   |     |   |     |
| Hyperglycemia                  | 1 | 3     | 9.7  | 1 | 3.2  |   |     |   |     |
|                                | 2 | 1     | 6.7  |   |      |   |     |   |     |
| Hypothyroidism                 | 1 | 2     | 6.5  | 1 | 3.2  |   |     |   |     |
|                                | 3 | 1     | 11.1 | 1 | 11.1 |   |     |   |     |
| Arthralgia                     | 1 | 2     | 6.5  | 1 | 3.2  |   |     |   |     |
|                                | 3 | 1     | 11.1 |   |      |   |     |   |     |
| Creatinine increased           | 1 | 2     | 6.5  | 1 | 3.2  |   |     |   |     |
|                                | 3 | 1     | 11.1 |   |      |   |     |   |     |
| Dry skin                       | 1 | 2     | 6.5  | 1 | 3.2  |   |     |   |     |
|                                | 2 | 1     | 6.7  |   |      |   |     |   |     |

| Adverse Event                    |   | Grade |      |   |      |   |      |   |   |
|----------------------------------|---|-------|------|---|------|---|------|---|---|
|                                  |   | 1     |      | 2 |      | 3 |      | 4 |   |
|                                  |   | N     | %    | N | %    | N | %    | N | % |
| Lymphocyte count decreased       | 1 | 2     | 6.5  |   |      |   |      |   |   |
|                                  | 2 |       |      | 1 | 6.7  |   |      |   |   |
|                                  | 3 | 1     | 11.1 |   |      |   |      |   |   |
| Mucositis oral                   | 1 | 3     | 9.7  | 1 | 3.2  |   |      |   |   |
| Oral pain                        | 1 | 3     | 9.7  |   |      |   |      |   |   |
|                                  | 3 | 1     | 11.1 |   |      |   |      |   |   |
| Skin and subcut tissue disord -  | 1 | 3     | 9.7  |   |      |   |      |   |   |
|                                  | 3 |       |      | 1 | 11.1 |   |      |   |   |
| Thromboembolic event             | 1 |       |      |   |      | 4 | 12.9 |   |   |
| Abdominal pain                   | 1 | 1     | 3.2  |   |      | 1 | 3.2  |   |   |
|                                  | 3 |       |      | 1 | 11.1 |   |      |   |   |
| Dehydration                      | 1 |       |      | 1 | 3.2  | 2 | 6.5  |   |   |
| Dizziness                        | 1 | 2     | 6.5  |   |      |   |      |   |   |
|                                  | 3 | 1     | 11.1 |   |      |   |      |   |   |
| Dyspepsia                        | 1 |       |      | 2 | 6.5  |   |      |   |   |
|                                  | 2 | 1     | 6.7  |   |      |   |      |   |   |
| Hypoalbuminemia                  | 1 | 1     | 3.2  | 1 | 3.2  |   |      |   |   |
|                                  | 3 |       |      | 1 | 11.1 |   |      |   |   |
| Hyponatremia                     | 1 | 2     | 6.5  |   |      | 1 | 3.2  |   |   |
| Investigations - Other, specify  | 1 | 1     | 3.2  |   |      |   |      |   |   |
|                                  | 2 | 1     | 6.7  |   |      |   |      |   |   |
|                                  | 3 | 1     | 11.1 |   |      |   |      |   |   |
| Palmar-plantar erythrodysesthesi | 1 | 1     | 3.2  | 1 | 3.2  |   |      |   |   |
|                                  | 3 | 1     | 11.1 |   |      |   |      |   |   |
| Proteinuria                      | 1 | 2     | 6.5  | 1 | 3.2  |   |      |   |   |
| Rash acneiform                   | 1 | 1     | 3.2  |   |      |   |      |   |   |
|                                  | 2 | 1     | 6.7  |   |      |   |      |   |   |
|                                  | 3 | 1     | 11.1 |   |      |   |      |   |   |

| Adverse Event                    |   | Grade |      |   |      |   |      |   |   |
|----------------------------------|---|-------|------|---|------|---|------|---|---|
|                                  |   | 1     |      | 2 |      | 3 |      | 4 |   |
|                                  |   | N     | %    | N | %    | N | %    | N | % |
| Edema limbs                      | 1 | 1     | 3.2  |   |      |   |      |   |   |
|                                  | 3 |       |      |   |      | 1 | 11.1 |   |   |
| Generalized muscle weakness      | 1 |       |      | 2 | 6.5  |   |      |   |   |
| Headache                         | 1 | 1     | 3.2  |   |      | 1 | 3.2  |   |   |
| Hemoglobin increased             | 1 | 1     | 3.2  |   |      |   |      |   |   |
|                                  | 3 | 1     | 11.1 |   |      |   |      |   |   |
| Hepatobiliary disorders - Other, | 1 |       |      |   |      | 2 | 6.5  |   |   |
| Hoarseness                       | 1 | 1     | 3.2  |   |      |   |      |   |   |
|                                  | 3 |       |      | 1 | 11.1 |   |      |   |   |
| Rash maculo-papular              | 1 | 1     | 3.2  |   |      |   |      |   |   |
|                                  | 3 |       |      | 1 | 11.1 |   |      |   |   |
| Sore throat                      | 1 | 1     | 3.2  |   |      | 1 | 3.2  |   |   |
| Anaphylaxis                      | 1 |       |      |   |      | 1 | 3.2  |   |   |
| Cardiac disorders - Other, speci | 1 | 1     | 3.2  |   |      |   |      |   |   |
| Chills                           | 2 | 1     | 6.7  |   |      |   |      |   |   |
| Chronic kidney disease           | 1 |       |      |   |      | 1 | 3.2  |   |   |
| Cough                            | 3 | 1     | 11.1 |   |      |   |      |   |   |
| Dry eye                          | 3 | 1     | 11.1 |   |      |   |      |   |   |
| Dysphagia                        | 3 | 1     | 11.1 |   |      |   |      |   |   |
| Dyspnea                          | 3 |       |      | 1 | 11.1 |   |      |   |   |
| ECG QT corrected interval prolon | 1 | 1     | 3.2  |   |      |   |      |   |   |
| Enterocolitis infectious         | 3 |       |      |   |      | 1 | 11.1 |   |   |
| Epistaxis                        | 1 | 1     | 3.2  |   |      |   |      |   |   |
| Flatulence                       | 3 |       |      | 1 | 11.1 |   |      |   |   |
| Gastroesophageal reflux disease  | 1 | 1     | 3.2  |   |      |   |      |   |   |
| Gastrointestinal disorders - Oth | 3 |       |      | 1 | 11.1 |   |      |   |   |
| Gen disord and admin site conds- | 1 | 1     | 3.2  |   |      |   |      |   |   |
| Hyperkalemia                     | 3 | 1     | 11.1 |   |      |   |      |   |   |
| Hyperthyroidism                  | 1 |       |      | 1 | 3.2  |   |      |   |   |

| Adverse Event                           |          | Grade |      |   |      |   |      |   |   |
|-----------------------------------------|----------|-------|------|---|------|---|------|---|---|
|                                         |          | 1     |      | 2 |      | 3 |      | 4 |   |
|                                         |          | N     | %    | N | %    | N | %    | N | % |
| <b>Hypokalemia</b>                      | <b>3</b> |       |      | 1 | 11.1 |   |      |   |   |
| <b>Hypophosphatemia</b>                 | <b>1</b> |       |      |   |      | 1 | 3.2  |   |   |
| <b>Hypotension</b>                      | <b>3</b> | 1     | 11.1 |   |      |   |      |   |   |
| <b>Insomnia</b>                         | <b>1</b> | 1     | 3.2  |   |      |   |      |   |   |
| <b>Lipase increased</b>                 | <b>1</b> |       |      |   |      | 1 | 3.2  |   |   |
| <b>Metabolism, nutrition disord - O</b> | <b>1</b> |       |      |   |      | 1 | 3.2  |   |   |
| <b>Musculoskeletal, conn tissue - O</b> | <b>1</b> |       |      | 1 | 3.2  |   |      |   |   |
| <b>Nail discoloration</b>               | <b>1</b> | 1     | 3.2  |   |      |   |      |   |   |
| <b>Neck pain</b>                        | <b>1</b> |       |      | 1 | 3.2  |   |      |   |   |
| <b>Nervous system disorders - Oth s</b> | <b>2</b> | 1     | 6.7  |   |      |   |      |   |   |
| <b>Pain in extremity</b>                | <b>3</b> |       |      |   |      | 1 | 11.1 |   |   |
| <b>Palpitations</b>                     | <b>1</b> | 1     | 3.2  |   |      |   |      |   |   |
| <b>Peripheral sensory neuropathy</b>    | <b>1</b> | 1     | 3.2  |   |      |   |      |   |   |
| <b>Portal vein thrombosis</b>           | <b>1</b> |       |      |   |      | 1 | 3.2  |   |   |
| <b>Pruritus</b>                         | <b>1</b> | 1     | 3.2  |   |      |   |      |   |   |
| <b>Tinnitus</b>                         | <b>1</b> | 1     | 3.2  |   |      |   |      |   |   |

Supplementary Figure 1. Percent Change in Tumor Size

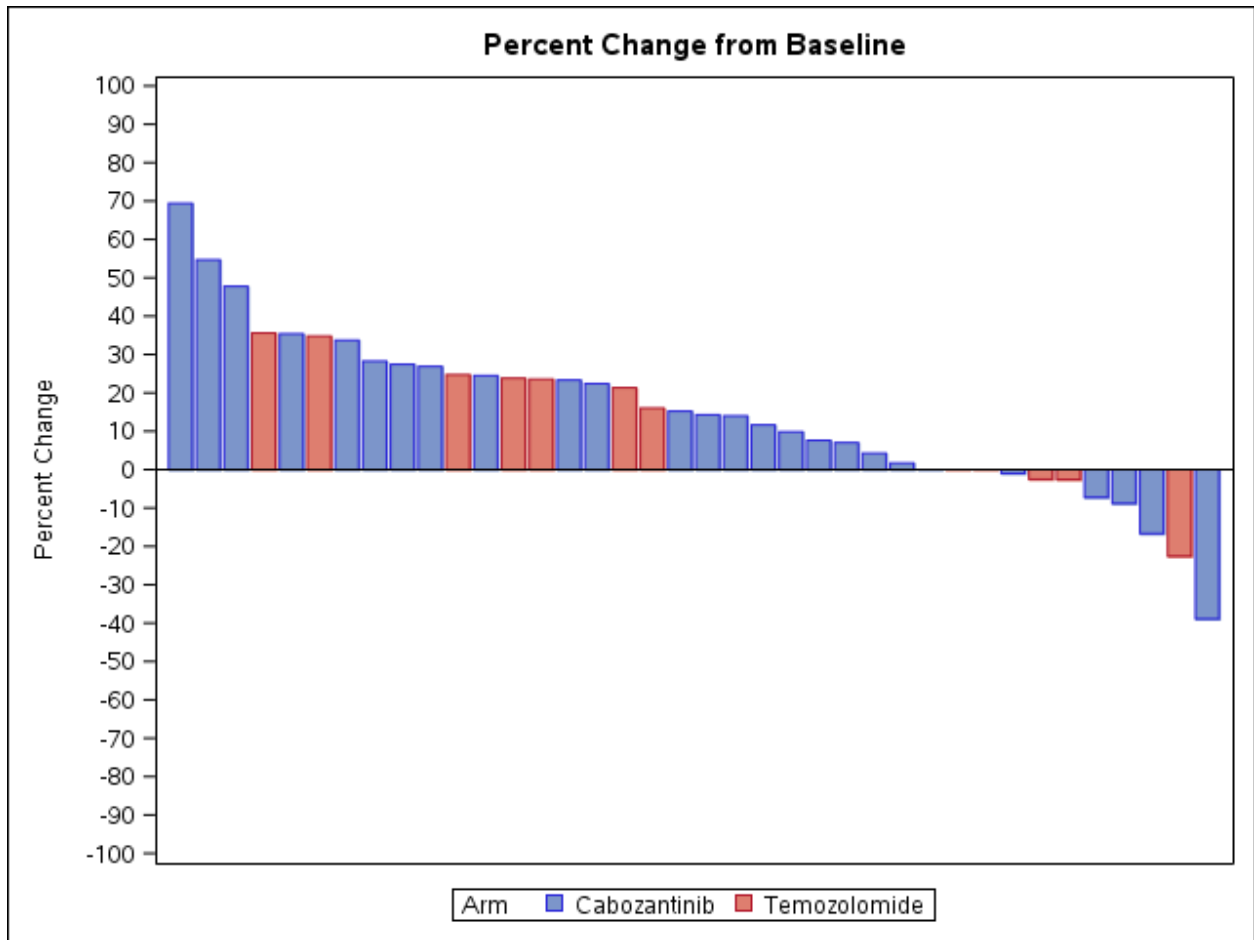

## Supplementary Figure 2. Somatic mutations in UM cases by whole exome sequencing.

Profiles of recurrent non-synonymous somatic mutations (NSSMs) in UM tumor including genes identified in exploratory fashion. Each column represents a separate case. Above each column is the mutational burden of each case as assessed by the total number of NSSMs per tumor.

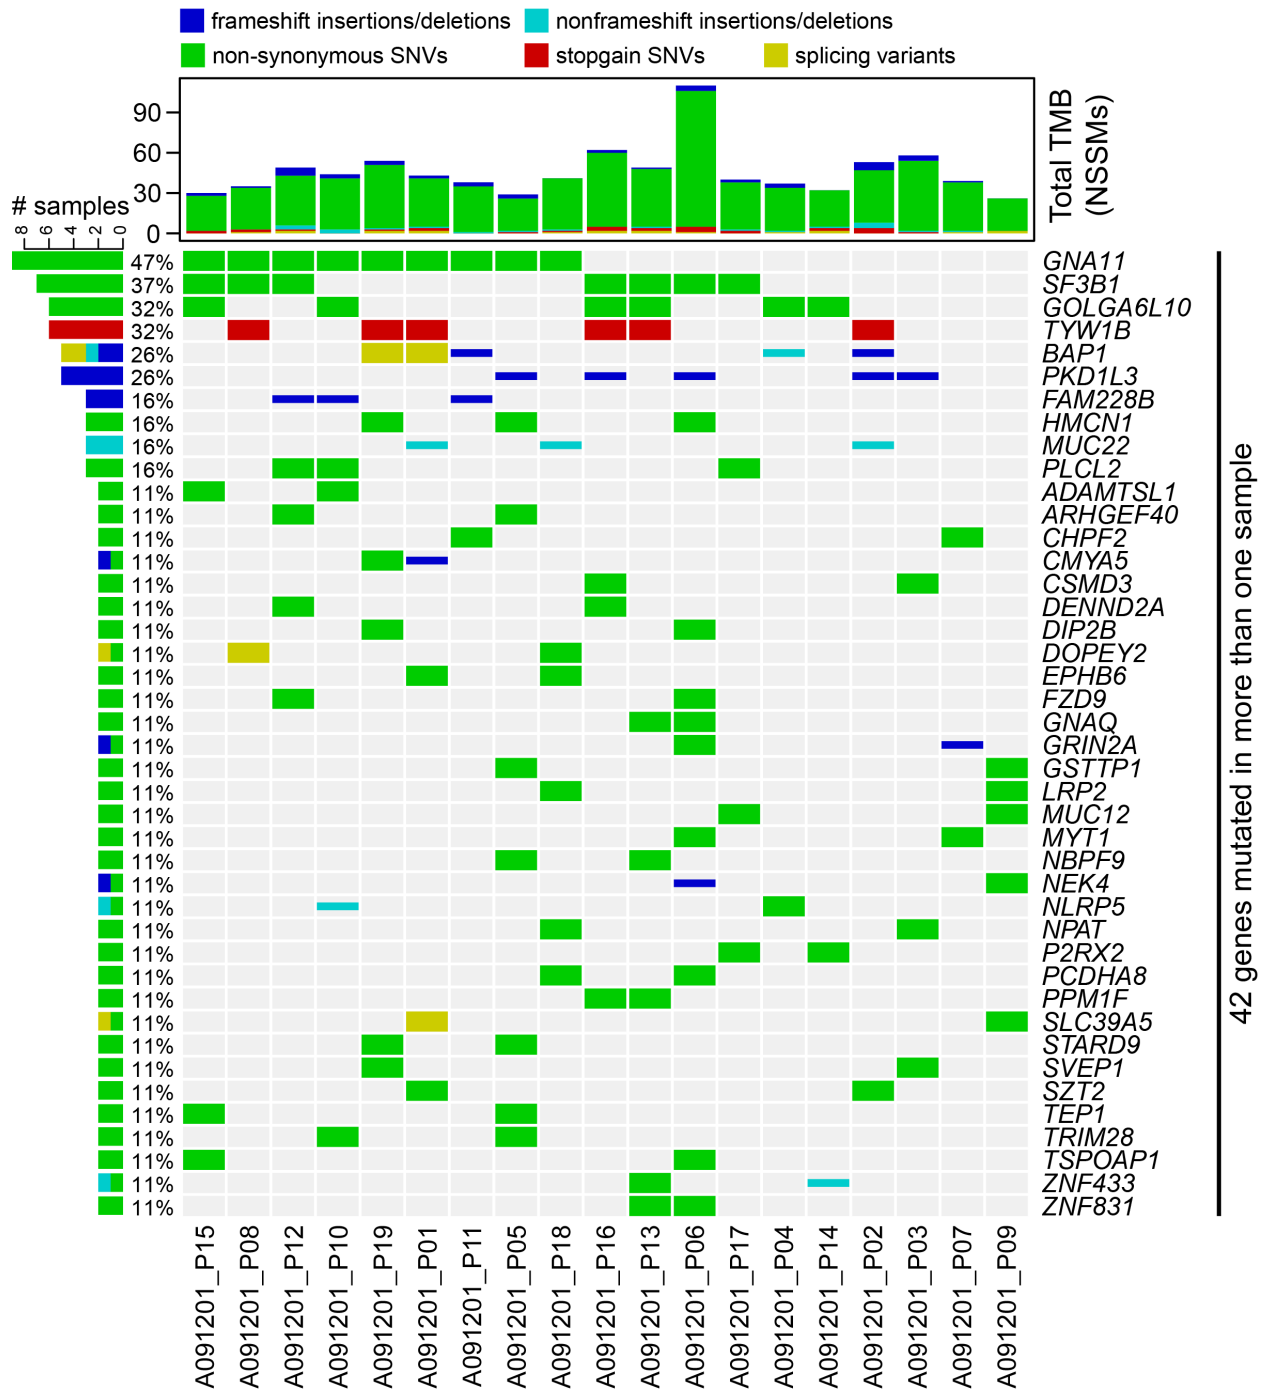

Supplement: NIHMS1540730-supplement-1.pdf [file NIHMS1540730-supplement-1.pdf]
